# Supplementary material
Source: PubMed Central journal article supplement (PMC5047841)

## STROBE 2007 (v4) Statement—Checklist of items that should be included in reports of cross-sectional studies

An observational study of the prevalence of toddler, child and adolescent overweight and obesity derived from primary care electronic medical records  
(Manuscript no. CMAJOpen-2015-0108)

| Section/ Topic            | Item # | Recommendation                                                                                                                                                                       | Reported on page #                                                   |
|---------------------------|--------|--------------------------------------------------------------------------------------------------------------------------------------------------------------------------------------|----------------------------------------------------------------------|
| Title and abstract        | 1      | (a) Indicate the study's design with a commonly used term in the title or the abstract                                                                                               | Title includes "observational study"                                 |
|                           |        | (b) Provide in the abstract an informative and balanced summary of what was done and what was found                                                                                  | Abstract section                                                     |
| Introduction              |        |                                                                                                                                                                                      |                                                                      |
| Background/ rationale     | 2      | Explain the scientific background and rationale for the investigation being reported                                                                                                 | Reported on page 1, lines 5 through 44.                              |
| Objectives                | 3      | State specific objectives, including any prespecified hypotheses                                                                                                                     | Reported on page 1, lines 46 through 53.                             |
| Methods                   |        |                                                                                                                                                                                      |                                                                      |
| Study design              | 4      | Present key elements of study design early in the paper                                                                                                                              | Reported on page 2, line 44-48.                                      |
| Setting                   | 5      | Describe the setting, locations, and relevant dates, including periods of recruitment, exposure, follow-up, and data collection                                                      | Reported on page 2, lines 18 through 25.                             |
| Participants              | 6      | (a) Give the eligibility criteria, and the sources and methods of selection of participants                                                                                          | Reported on page 2, lines 37 through 48; page 3, lines 8 through 13. |
| Variables                 | 7      | Clearly define all outcomes, exposures, predictors, potential confounders, and effect modifiers. Give diagnostic criteria, if applicable                                             | Reported on page 3, lines 17 through 56; page 4, lines 3-6.          |
| Data sources/ measurement | 8*     | For each variable of interest, give sources of data and details of methods of assessment (measurement). Describe comparability of assessment methods if there is more than one group | Reported on page 2, lines 18 through 25.                             |
| Bias                      | 9      | Describe any efforts to address potential sources of bias                                                                                                                            | Reported on page 2, line 53-56; page 3,                              |

For Peer Review Only

|                        |     |                                                                                                                                                                                                   |                                                                                                  |
|------------------------|-----|---------------------------------------------------------------------------------------------------------------------------------------------------------------------------------------------------|--------------------------------------------------------------------------------------------------|
|                        |     |                                                                                                                                                                                                   | lines 3-6.                                                                                       |
| Study size             | 10  | Explain how the study size was arrived at                                                                                                                                                         | Page 2, lines 39 through 44.                                                                     |
| Quantitative variables | 11  | Explain how quantitative variables were handled in the analyses. If applicable, describe which groupings were chosen and why                                                                      | Reported on page 4, lines 10 through 25.                                                         |
| Statistical methods    | 12  | (a) Describe all statistical methods, including those used to control for confounding                                                                                                             | Reported on page 4, lines 10 through 25.                                                         |
|                        |     | (b) Describe any methods used to examine subgroups and interactions                                                                                                                               | Reported on page 4, lines 10 through 25.                                                         |
|                        |     | (c) Explain how missing data were addressed                                                                                                                                                       | Reported on page 2, lines 39-44.                                                                 |
|                        |     | (d) If applicable, describe analytical methods taking account of sampling strategy                                                                                                                | n/a                                                                                              |
|                        |     | (e) Describe any sensitivity analyses                                                                                                                                                             | n/a                                                                                              |
| Results                |     |                                                                                                                                                                                                   |                                                                                                  |
| Participants           | 13* | (a) Report numbers of individuals at each stage of study—eg numbers potentially eligible, examined for eligibility, confirmed eligible, included in the study, completing follow-up, and analysed | Reported on page 5, lines 10 through 32 plus addition of figure 1: flow diagram                  |
|                        |     | (b) Give reasons for non-participation at each stage                                                                                                                                              | Exclusions are reported on page 5, lines 10 through 32 plus addition of figure 1: flow diagram   |
|                        |     | (c) Consider use of a flow diagram                                                                                                                                                                | Inserted                                                                                         |
| Descriptive data       | 14* | (a) Give characteristics of study participants (eg demographic, clinical, social) and information on exposures and potential confounders                                                          | Reported on page 5, lines 46 through 56, and page 6, lines 3-6, plus additional tables 1, 2 & 3. |

For Peer Review Only

|                   |     |                                                                                                                                                                                                              |                                                                                                  |
|-------------------|-----|--------------------------------------------------------------------------------------------------------------------------------------------------------------------------------------------------------------|--------------------------------------------------------------------------------------------------|
|                   |     | (b) Indicate number of participants with missing data for each variable of interest                                                                                                                          | Have not included                                                                                |
| Outcome data      | 15* | Report numbers of outcome events or summary measures                                                                                                                                                         | Reported on page 5, lines 46 through 56, and page 6, lines 3-6, plus additional tables 1, 2 & 3. |
| Main results      | 16  | (a) Give unadjusted estimates and, if applicable, confounder-adjusted estimates and their precision (eg, 95% confidence interval). Make clear which confounders were adjusted for and why they were included | Tables 1, 2, & 3.                                                                                |
|                   |     | (b) Report category boundaries when continuous variables were categorized                                                                                                                                    | Tables 1, 2, & 3.                                                                                |
|                   |     | (c) If relevant, consider translating estimates of relative risk into absolute risk for a meaningful time period                                                                                             | n/a                                                                                              |
| Other analyses    | 17  | Report other analyses done—eg analyses of subgroups and interactions, and sensitivity analyses                                                                                                               | Page 7, lines 8 through 23 and Tables 1, 2, & 3.                                                 |
| Discussion        |     |                                                                                                                                                                                                              |                                                                                                  |
| Key results       | 18  | Summarise key results with reference to study objectives                                                                                                                                                     | Page 7, lines 44 through 56, and page 8, line 3.                                                 |
| Limitations       | 19  | Discuss limitations of the study, taking into account sources of potential bias or imprecision. Discuss both direction and magnitude of any potential bias                                                   | Page 9, lines 10 through 56; page 10 lines 3 through 20.                                         |
| Interpretation    | 20  | Give a cautious overall interpretation of results considering objectives, limitations, multiplicity of analyses, results from similar studies, and other relevant evidence                                   | Page 9, lines 10 through 56; page 10 lines 3 through 20.                                         |
| Generalisability  | 21  | Discuss the generalisability (external validity) of the study results                                                                                                                                        | Page 9, lines 22-30.                                                                             |
| Other information |     |                                                                                                                                                                                                              |                                                                                                  |
| Funding           | 22  | Give the source of funding and the role of the funders for the present study and, if applicable, for the original study on which the present article is based                                                | This is provided in the conflict of interest section and the acknowledgements section.           |

For Peer Review Only

1  
2  
3  
4  
5  
6  
7  
8  
9  
10  
11  
12  
13  
14  
15  
16  
17  
18  
19  
20  
21  
22  
23  
24  
25  
26  
27  
28  
29  
30  
31  
32  
33  
34  
35  
36  
37  
38  
39  
40  
41  
42  
43  
44  
45  
46  
47  
48  
49

\* Give information separately for cases and controls in case-control studies and, if applicable, for exposed and unexposed groups in cohort and cross-sectional studies.

Note: An Explanation and Elaboration article discusses each checklist item and gives methodological background and published examples of transparent reporting. The STROBE checklist is best used in conjunction with this article (freely available on the Web sites of PLoS Medicine at <http://www.plosmedicine.org/>, Annals of Internal Medicine at <http://www.annals.org/>, and Epidemiology at <http://www.epidem.com/>). Information on the STROBE Initiative is available at [www.strobe-statement.org](http://www.strobe-statement.org).

Confidential

For Peer Review Only

1  
2  
3 INTRODUCTION  
4  
5

6 One third of Canadian children and adolescents, aged 5 to 17 years are overweight or  
7 obese (1). Children with obesity have higher risk for both short-term health consequences (2–5)  
8 and long term persistence of obesity into adulthood (6–8). Evidence demonstrates that early  
9 childhood is a critical time for obesity prevention strategies and that early markers of obesity  
10 could be targeted for universal and individual intervention strategies to show positive, long term,  
11 health benefits (9–11). In Canada, child and adolescent population health monitoring is limited.  
12  
13 There are a few national surveys, such as the Canadian Community Health Survey (CCHS) (ages  
14 12+), the Health Behaviour in School-Aged Children Survey (ages 11–15) and the National  
15 Longitudinal Study of Children and Youth that provide population level surveillance data (12–  
16 14). In 2004 and 2005 the CCHS included representative subsamples in which height and weight  
17 were measured. Measured heights and weights are also obtained as part of the Canadian Health  
18 Measures Survey (CHMS) (aged 3 to 79 years)(15). However, data on 3 to 5 year olds represents  
19 approximately 500 children from across Canada. The absence of data under 3 years is a critical  
20 gap given that early life trajectories in growth and development are of great significance in  
21 determining lifelong health and well-being. Also, the lack of objectively measured data at  
22 regional levels severely limits design and evaluation efforts of a “whole system” public health  
23 approach to the prevention of childhood obesity (16).  
24  
25  
26  
27  
28  
29  
30  
31  
32  
33  
34  
35  
36  
37  
38  
39  
40  
41  
42  
43  
44

45 We conducted this study to determine the prevalence of overweight and obesity, using  
46 measured heights and weights for toddlers, children and adolescents under 20 years, derived  
47 from a sample of primary care electronic medical records from the Canadian Primary Care  
48 Sentinel Surveillance Network (CPCSSN) chronic disease database (17,18). In particular, to fill  
49  
50  
51  
52  
53  
54  
55  
56  
57  
58  
59  
60

1  
2  
3 the known data gap, we examined height and weight data for toddlers under age 2 years and  
4  
5 assessed it in relation to a known well child visit, the enhanced 18-month well baby visit.  
6

## 7 8 Methods

### 9 10 Setting and Sources of Data

11  
12 The Canadian Primary Care Sentinel Surveillance Network (CPCSSN) database contains  
13  
14 standardized, de-identified electronic medical record (EMR) data from multiple EMR platforms,  
15  
16 from ten primary care practice-based research networks across Canada. For this study, data was  
17  
18 extracted from EMRs on all patients from three Ontario networks of the CPCSSN (the Eastern  
19  
20 Ontario Network, the University of Toronto Practice Based Research Network and London's  
21  
22 Deliver Primary Healthcare Information Project). Extracted data from EMRs included all  
23  
24 patients who had an encounter with a CPCSSN primary care provider prior to March 31<sup>st</sup>, 2014.  
25  
26 Duplicate patient records were removed and remaining EMR data was standardized using  
27  
28 established CPCSSN algorithmic coding processes. For example, each height and weight value is  
29  
30 cleaned and converted into standard units (kilograms, centimeters). Following standardization,  
31  
32 the EMR data was uploaded into the CPCSSN database. For this study, additional eligible  
33  
34 patients were excluded if key measurement variables were missing: height (length), weight, date  
35  
36 of height taken, date of weight taken, year of birth, and month of birth. Data for this  
37  
38 observational study included all height and weight records for children under 20 years of age,  
39  
40 between 2004 and December 31<sup>st</sup>, 2013 to produce a sample for cross-sectional research. Data  
41  
42 from 2013 was selected to report growth status indicators as this year provided the largest sample  
43  
44 set. In addition, we obtained the encounter date (clinic visit date), the child's month and year of  
45  
46 birth, and sex. The A002 and A002A fee codes corresponding to the enhanced 18-month well  
47  
48 baby visit were also extracted (19). Because a toddler's primary care clinic encounter could be  
49  
50  
51  
52  
53  
54  
55  
56  
57  
58  
59  
60

1  
2  
3 associated with either a wellness or illness visit, the fee code was used to assess weight  
4  
5 classification against a known “well toddler” visit. To provide a larger data set for this  
6  
7 comparison, toddler visits with length and height measurements collected on the same date were  
8  
9 taken from January 1<sup>st</sup>, 2008 to December 31<sup>st</sup>, 2013. If a toddler had weight-for-length values  
10  
11 available, the latest one was used.  
12  
13

#### 14 Measures

15  
16 The World Health Organization (WHO) Growth Standards (birth to five years) and Reference (5  
17  
18 to 19 years) were used to assign growth status indicators (20,21). Body mass index (BMI)  
19  
20 (weight in kilograms/height in metres<sup>2</sup>) was calculated from height and weight measurements  
21  
22 that were collected on the same date for children and adolescents 5 to 19 years of age. If a child  
23  
24 or adolescent had multiple BMI values available in 2013, the latest one was used. BMI-for-age  
25  
26 was used as the growth status indicator, classified into four categories: “wasting”, “normal  
27  
28 weight”, “overweight” and “obesity”. The BMI-for-age cut-off point for “overweight” was >85<sup>th</sup>  
29  
30 percentile and the cut-off point for “obesity” was >97<sup>th</sup> percentile for these age groups.  
31  
32  
33  
34  
35

36  
37 As per recommendations outlined in the Canadian collaborative statement: using the new  
38  
39 WHO growth charts, weight-for-length was used as the growth status indicator for children birth  
40  
41 to 2 years of age (toddlers) (21). Weight-for-length was calculated from length and weight  
42  
43 measurements that were collected on the same date. If a toddler had multiple weight-for-length  
44  
45 values available between 2008 to 2013, the latest one was used. Similarly, for preschool aged  
46  
47 children (2-5 years), BMI-for-age was used as the growth status indicator. Toddler and preschool  
48  
49 aged children were classified into five growth status indicator categories as “wasting”, “normal  
50  
51 weight”, “risk of overweight”, “overweight” and “obesity”. The cut-off point for these age  
52  
53 groups differ from older children and adolescents: the cut-off point for “risk of overweight” was  
54  
55  
56  
57  
58  
59  
60

1  
2  
3 >85<sup>th</sup> percentile; the cutoff point for “overweight” was > 97<sup>th</sup> percentile; and the cutoff point  
4  
5 for “obesity” was >99<sup>th</sup> percentile.  
6

## 7 8 Statistical Analysis 9

10 We calculated prevalence estimates for growth indicator variables and expressed the results in  
11  
12 terms of percentage and corresponding 95% confidence interval values by sex and age (as of the  
13  
14 date for height/length and weight measurement). In addition, we compared the proportion of  
15  
16 toddlers with the 18-month enhanced well baby visit fee code to those without a fee code.  
17

18 Significant differences between prevalence estimates within variable categories were assessed  
19  
20 using chi square tests. Alpha was set a priori at 0.05. Variable classifications and all statistical  
21  
22 analyses were performed in 2015 using SAS, version 9.3.  
23  
24

25  
26 This study was approved by the Health Sciences Research Ethics Board at Queen's  
27  
28 University.  
29

## 30 31 Results 32

33 In total, 349 613 patients were extracted from source EMRs. Duplicate records (5915)  
34  
35 were identified and removed and the remaining 343 698 patient records were uploaded to the  
36  
37 CPCSSN database. Patient records with a missing month of birth (118 139), a missing or invalid  
38  
39 height or weight measurement, or weight measurement without a height measurement taken on  
40  
41 the same date (100 986) were excluded. Patients 20 years and older were removed from the  
42  
43 dataset (97 070). A further 4651 weight and height records in the remaining dataset were  
44  
45 removed as the measurements were taken outside the study period. The final child and  
46  
47 adolescent sample of children with weight and height records (with the same measurement date)  
48  
49 taken between January 1, 2008 and December 31, 2013, was 22 852. See Figure 1 for a flow  
50  
51 diagram of the study sample inclusion process.  
52  
53  
54  
55  
56  
57  
58  
59  
60



1  
2  
3  
4 In 2013, there was a total of 5310 school aged children, 5 to 19 years of age, with BMI\$  
5  
6 for\$age calculated from height and weight measurements that were collected on the same date.

7  
8 There was a total of 1842 preschool aged children, 2\$5 years of age with BMI\$for\$age and a total  
9  
10 of 1127 toddlers (0\$2 years of age) with a weight\$for length calculated from length and weight  
11  
12 measurements that were collected on the same date in 2013. This represents a total of 8279  
13  
14 children, birth to 19 years of age, with a growth status indicator derived from objectively  
15  
16 measured height (length) and weights.  
17  
18

19  
20 BMI\$for\$age for school aged children, 5\$19 years old, derived from the last height and  
21  
22 weight measurements taken from encounters in 2013 are presented in Table 1. The prevalence of  
23  
24 overweight and obesity, overall was28.4%. Boys and girls were equally represented (48.1% and  
25  
26 51.8% respectively). Significantly more boys, 12\$19 years of age, were categorized as  
27  
28 overweight and obese compared with girls in the same age group. For boys 5 to 11 years of age,  
29  
30 there were significantly more categorised as obese compared with girls in the same age group. It  
31  
32 follows that girls were significantly more likely to be categorised as normal weight compared  
33  
34 with boys. There were no significant differences across age groups within BMI\$for\$age  
35  
36 categories for children and adolescents 5\$19 years of age. .  
37  
38  
39  
40

41  
42 The percentage distribution of toddler (0\$2 years of age) and preschool children (2\$5  
43  
44 years of age) by growth status indicator, weight\$for\$length and BMI\$for\$age, respectively, are  
45  
46 presented in Table 2. Overall, 6% of toddler\$and preschool\$aged children were classified as  
47  
48 overweight or obese in 2013; 18.1% were classified as having risk of overweight. Recognising  
49  
50 different growth indicators for these two age groups may prohibit comparison of growth between  
51  
52 age groups, there appeared to be significantly more toddlers classified as wasting, 6.8%,  
53  
54 compared with preschool aged children,2.7%, (and consequently, preschool aged children were  
55  
56  
57  
58  
59  
60

1  
2  
3 more likely to be classified as having normal weight). Both toddler and preschool aged girls  
4  
5 were significantly more likely to be classified as normal weight compared with boys in the same  
6  
7 age groups.  
8  
9

10 Between 2008 and 2013, toddlers who had physician encounters without an 18-month  
11 enhanced well baby visit fee code assigned, were significantly more likely to be classified as  
12 wasting compared to toddlers with well baby visits, 9.1 % versus 3.3% respectively (Table 3).  
13  
14 Significantly more boys, 10.9%, in the wasting category visited their physician for reasons other  
15 than a well baby visit, compared with girls, 7.1%. The overall percentage of toddlers who were  
16  
17 classified as overweight and obese between 2008 and 2013 was 6.7 %; 17.5% were classified as  
18  
19 having risk of overweight.  
20  
21  
22  
23  
24  
25  
26  
27  
28

### 29 Interpretation

30  
31 This study represents the first population assessment report on the prevalence of overweight and  
32 obesity among toddlers under age 2 years in Canada based on objectively measured heights and  
33 weights. Our results indicate that 6.7% of toddlers, less than 2 years of age, are already  
34  
35 overweight or obese and that 18% are at risk of overweight. For school aged children and  
36  
37 adolescents, 5-19 years, population estimates of overweight and obesity in our study are slightly  
38  
39 lower than estimates derived from the CHMS (2009 to 2011) for children 5-17 years (22),  
40  
41 28.4% versus 31.5% respectively. Likely, this lower estimate is due to more “unwell” child  
42  
43 visits with primary care providers in our study population compared with a general population.  
44  
45 Similarities across weight-for-length categorizations for normal, risk of overweight, overweight  
46  
47 and obesity for toddlers under 2 years with and without a “well child visit” code, indicate that  
48  
49 weight-for-length measures derived from primary care EMRs can provide good proxy population  
50  
51  
52  
53  
54  
55  
56  
57  
58  
59  
60

1  
2  
3 risk of overweight, overweight and obesity estimates for this younger age group. The  
4  
5 discrepancy between groups for the wasting category supports the inherent population bias in our  
6  
7 study: likely children with poor weight gain in infancy or who are unwell at a younger age are  
8  
9 more often visiting primary care providers.  
10

11  
12 Our study includes height (length) and weight measurements for a large number of children  
13  
14 and adolescents below 20 years of age, and for the first time, population assessment measures for  
15  
16 toddlers and preschool aged children below 3 years. Our study included 8,279 toddlers, children  
17  
18 and adolescents and their corresponding growth indicators, a sample close to four times larger  
19  
20 than the national survey sample from the second cycle of the CHMS (22). Moreover, indicator  
21  
22 variables were derived from objectively measured length, height and weight records in a clinical  
23  
24 setting. Parent-reported measures of child heights and weights are consistently underestimated  
25  
26 (23). It is commonly agreed that the best place for measuring length, height and weight is  
27  
28 primary health care settings during routine wellness visits; this setting minimises concerns about  
29  
30 unintended negative consequences related to growth monitoring in other settings (e.g. schools)  
31  
32 such as stigmatization; ensures appropriate equipment is used; provides ongoing staff training ;  
33  
34 and follows measurement protocols (24–26).  
35  
36  
37  
38  
39  
40

41  
42 There are limitations of this study. First, our results depend on the quality of data that we  
43  
44 were able to extract. The recording of primary care EMR data continues to suffer entry error and  
45  
46 can be absent or unavailable for use (27–29). Missing measurements for length, heights and  
47  
48 weights and data standardization is variable across clinics and EMRs and also within the same  
49  
50 EMR (30,31). Second, our study population was limited to patients who visit their primary care  
51  
52 providers. In a study investigating the representativeness of patients in CPCSSN, network  
53  
54 patients were reasonably representative of patients in Canadian primary care practices and only  
55  
56  
57  
58  
59  
60

1  
2  
3 somewhat representative of the Canadian general population (32). Ontario had the highest  
4  
5 proportion of patients in CPCSSN; provincial level comparison was reasonable (32). Third, our  
6  
7 data was derived from physicians who participate as sentinels with the CPPSSN, limiting data  
8  
9 extraction to include only providers who use electronic medical records. Though the number of  
10  
11 primary care physicians using EMRs in Canada ( 77.6%) has more than doubled since 2006, there  
12  
13 may be practice differences between providers who use or don't use EMRs (33,34). Since our  
14  
15 study population was comprised of toddlers, children and adolescents who visit their primary  
16  
17 care provider, the children may represent a population with shifting growth indicator measures  
18  
19 due to medical reasons, biasing our prevalence estimates (35). Fourth, for toddlers less than 2  
20  
21 years of age, length is most often measured laying down as opposed to standing. There are  
22  
23 inherent practical challenges to provide accurate measurement of length for infants and toddlers,  
24  
25 despite standardized techniques and equipment (21). For example, it is difficult for toddlers to lie  
26  
27 still and to capture a measurement with full extension of the legs. Similarly, height  
28  
29 measurements for older children may be biased by measurement variability. Despite measures  
30  
31 taken by trained care providers in primary care settings, it is possible growth indicator  
32  
33 classifications may not be accurately derived given the measurement difficulty. Finally, it is  
34  
35 important to note that weight, length and BMI for age growth indicators represent only one of  
36  
37 many risk factors (9,11,36), and that any prevention or treatment strategy, whether targeted or  
38  
39 universal, must clearly account for the complexity of factors that influence healthy growth and  
40  
41 development.  
42  
43  
44  
45  
46  
47  
48  
49

50 These findings have important implications. Evidence clearly indicates the need to assess  
51  
52 weight status in children and adolescents and particularly for toddlers and preschoolers less than  
53  
54 3 years of age (25). Our study demonstrates that EMR data is a valuable source for this  
55  
56  
57  
58  
59  
60

1  
2  
3  
4  
5  
6  
7  
8  
9  
10  
11  
12  
13  
14  
15  
16  
17  
18  
19  
20  
21  
22  
23  
24  
25  
26  
27  
28  
29  
30  
31  
32  
33  
34  
35  
36  
37  
38  
39  
40  
41  
42  
43  
44  
45  
46  
47  
48  
49  
50  
51  
52  
53  
54  
55  
56  
57  
58  
59  
60

information. These results provide a foundation upon which to build an ongoing, regionally specific, longitudinal monitoring system for population healthy weight status of Canadian toddlers, children and adolescents, especially toddlers, against which prevention measures may be designed, implemented and evaluated. Though primary health care could become an improved source for healthy weight surveillance, a whole system population health approach to prevention is necessary (16,37,38). Our study demonstrates the first steps toward improving our knowledge so that collectively, clinical and community partners know how, when and where to focus and scale successful health promotion programming and policies.

Confidential

## References

1. Roberts K, Shields M, de Groh M, Aziz A, Gilbert JSA. Overweight and obesity in children and adolescents: results from the 2009 to 2011 Canadian Health Measures Survey. [Internet]. 2012. [cited 2013 Oct 18] Available from: <http://www.statcan.gc.ca/pub/82-625-x/2012003/article/11706-eng.pdf>
2. Reilly J, Methuen E, McDowell Z, Hacking B, Alexander D, Stewart L, et al. Health consequences of obesity. Arch Dis Child [Internet]. 2003 Sep [cited 2013 Oct 18];88(9):748–52. Available from: <http://www.pubmedcentral.nih.gov/articlerender.fcgi?artid=1719633&tool=pmcentrez&rendertype=abstract>
3. Freedman D, Zuzuo M, Srinivasan S, Berenson G, Dietz WH. Cardiovascular Risk Factors and Excess Adiposity Among Overweight Children and Adolescents: The Bogalusa Heart Study. J Pediatr. 2007;150(1):12–e2.
4. Thompson D, Obarzanek E, Franko D, Barton B, Morrison J, Biro F, et al. Childhood overweight and cardiovascular disease risk factors: The national heart, lung, and blood institute growth and health study. J Pediatr. 2007;150(1):18–25.
5. Cockrell Skinner A, Mayer M, Flower K, Perrin E, Weinberger M. Using BMI to determine cardiovascular risk in childhood: how do the BMI cutoffs fare? Pediatrics [Internet]. 2009 Nov [cited 2013 Oct 18];124(5):e905–12. Available from: <http://www.pubmedcentral.nih.gov/articlerender.fcgi?artid=2909481&tool=pmcentrez&rendertype=abstract>
6. Park MH, Falconer C, Viner RM, Kinra S. The impact of childhood obesity on morbidity and mortality in adulthood: a systematic review. Obes Rev [Internet]. 2012 Nov [cited 2013 Oct 18];13(11):985–1000. Available from: <http://www.ncbi.nlm.nih.gov/pubmed/22731928>
7. Singh a S, Mulder C, Twisk J, van Mechelen W, Chinapaw M. Tracking of childhood overweight into adulthood: a systematic review of the literature. Obes Rev [Internet]. 2008 Sep [cited 2015 Feb 11];9(5):474–88. Available from: <http://www.ncbi.nlm.nih.gov/pubmed/18331423>
8. Herman K, Craig C, Gauvin L, Katzmarzyk P. Tracking of obesity and physical activity from childhood to adulthood: the physical activity longitudinal study. Int J Pediatr Obes [Internet]. 2009 Jan [cited 2015 Apr 21];4(4):281–8. Available from: <http://www.ncbi.nlm.nih.gov/pubmed/19922043>
9. Brisbois T, Farmer a P, McCargar L. Early markers of adult obesity: a review. Obes Rev [Internet]. 2012 Apr [cited 2013 Oct 18];13(4):347–67. Available from: <http://www.pubmedcentral.nih.gov/articlerender.fcgi?artid=3531624&tool=pmcentrez&rendertype=abstract>

10. Matusik P, Malecka-Tendera E. Overweight prevention strategies in preschool children. *Int J Pediatr Obes* [Internet]. 2011 Oct [cited 2013 Oct 18];6 Suppl 2:2–5. Available from: <http://www.ncbi.nlm.nih.gov/pubmed/21923286>
11. Weng S, Redsell S, Swift J, Yang M, Glazebrook C. Systematic review and meta-analyses of risk factors for childhood overweight identifiable during infancy. *Arch Dis Child* [Internet]. 2012 Dec [cited 2013 Oct 18];97(12):1019–26. Available from: <http://www.pubmedcentral.nih.gov/articlerender.fcgi?artid=3512440&tool=pmcentrez&rendertype=abstract>
12. Government of Canada. Canadian Community Health Survey \$Annual Component (CCHS) [Internet]. [cited 2015 Oct 6]. Available from: <http://www23.statcan.gc.ca/imdb/p2SV.pl?Function=getSurvey&SDDS=3226>
13. Roberts C, Freeman J, Samdal O, Schnohr CW, de Looze ME, Nic Gabhainn S, et al. The Health Behaviour in School-Aged Children (HBSC) study: methodological developments and current tensions. *Int J Public Health* [Internet]. 2009 Sep [cited 2013 Oct 18];54 Suppl 2:140–50. Available from: <http://www.pubmedcentral.nih.gov/articlerender.fcgi?artid=2732766&tool=pmcentrez&rendertype=abstract>
14. National Longitudinal Survey of Children and Youth (NLSCY) [Internet]. 1AD [cited 2015 May 22]. Available from: <http://www23.statcan.gc.ca/imdb/p2SV.pl?Function=getSurvey&SDDS=4450>
15. Government of Canada. Canadian Health Measures Survey (CHMS) [Internet]. [cited 2013 Oct 21]. Available from: [http://www23.statcan.gc.ca/imdb/p2SV.pl?Function=getSurvey&SDDS=5071&Item\\_Id=129548&lang=en](http://www23.statcan.gc.ca/imdb/p2SV.pl?Function=getSurvey&SDDS=5071&Item_Id=129548&lang=en)
16. Dietz WH, Baur LA, Hall K, Puhl RM, Taveras EM, Uauy R, et al. Management of obesity: improvement of health-care training and systems for prevention and care. *Lancet* [Internet]. Elsevier; 2015 Feb 18 [cited 2015 Feb 20]; Available from: <http://www.thelancet.com/article/S0140673614617487/fulltext>
17. Birtwhistle R, Williamson T. Primary care electronic medical records: a new data source for research in Canada. *CMAJ* [Internet]. 2015 Mar 3;187(4):239–40. Available from: <http://www.ncbi.nlm.nih.gov/pubmed/25421989>
18. Birtwhistle R, Keshavjee K, Lambert-Lanning A, Godwin M, Greiver M, Manca D, et al. Building a pan-Canadian primary care sentinel surveillance network: initial development and moving forward. *J Am Board Fam Med* [Internet]. 2009 [cited 2013 Oct 18];22(4):412–22. Available from: <http://www.ncbi.nlm.nih.gov/pubmed/19587256>

19. The Education and Prevention Committee. Enhanced 18-Month Well Baby Visit, and Foot Care Services. 2010;8(5):25–7. Available from: [https://www.oma.org/Resources/Documents/0805EPC\\_Bulletin.pdf](https://www.oma.org/Resources/Documents/0805EPC_Bulletin.pdf)
20. The WHO Child Growth Standards. Geneva (Switzerland): World Health Organization; [cited 2014 Oct 16]. Available from: <http://www.who.int/childdgrowth/en/>
21. Dietitians of Canada and Canadian Pediatric Society. Promoting optimal monitoring of child growth in Canada using the new WHO growth charts. Collaborative public policy statement. Available from: [www.dietitians.ca/downloadable\\$content/public/tcg\\$position\\$paper.aspx](http://www.dietitians.ca/downloadable$content/public/tcg$position$paper.aspx)
22. Roberts KC, Shields M, de Groh M, Aziz A, Gilbert JSA. Overweight and obesity in children and adolescents: results from the 2009 to 2011 Canadian Health Measures Survey. *Health Rep* 2012;23(3):37–41.
23. Shields M, Gorber SC, Janssen I, Tremblay MS. Obesity estimates for children based on parent-reported versus direct measures. *Health Reports*. 2011;22(3).
24. Ontario Agency for Health Protection and Promotion (Public Health Ontario). Measuring the health of infants, children and youth for public health in Ontario: Indicators, gaps and recommendations for moving forward. Toronto, ON: Queen's Printer for Ontario; 2013.
25. Force CT, Care PH. Recommendations for growth monitoring, and prevention and management of overweight and obesity in children and youth in primary care. *CMAJ*. 2015;187(6):411–21.
26. Himes JH. Challenges of accurately measuring and using BMI and other indicators of obesity in children. *Pediatrics* [Internet]. 2009 Sep [cited 2013 Oct 18];124 Suppl S3–22. Available from: <http://www.ncbi.nlm.nih.gov/pubmed/19720665>
27. Shephard E, Stapley S, Hamilton W. The use of electronic databases in primary care research. *Fam Pract* [Internet]. 2011 Aug [cited 2015 May 27];28(4):352–4. Available from: <http://www.ncbi.nlm.nih.gov/pubmed/21791530>
28. Greiver M, Barnsley J, Glazier RH, Harvey BJ, Moineddin R. Measuring data reliability for preventive services in electronic medical records. *BMC Health Serv Res* [Internet]. 2012 Jan [cited 2015 May 27];12:116. Available from: <http://www.pubmedcentral.nih.gov/articlerender.fcgi?artid=3442990&tool=pmcentrez&rendertype=abstract>
29. Coleman N, Halas G, Peeler W, Casaciang N, Williamson T, Katz A. From patient care to research: a validation study examining the factors contributing to data quality in a primary care electronic medical record database. *BMC Fam Pract* [Internet]. 2015 Feb 5 [cited 2015 Feb 11];16(1):11. Available from: <http://www.ncbi.nlm.nih.gov/pubmed/25649201>



- 1  
2  
3  
4  
5  
6  
7  
8  
9  
10  
11  
12  
13  
14  
15  
16  
17  
18  
19  
20  
21  
22  
23  
24  
25  
26  
27  
28  
29  
30  
31  
32  
33  
34  
35  
36  
37  
38  
39  
40  
41  
42  
43  
44  
45  
46  
47  
48  
49  
50  
51  
52  
53  
54  
55  
56  
57  
58  
59  
60
30. Rigobon A, Birtwhistle R, Khan S, Barber D, Biro S, Morkem R, Janssen I, Williamson T. Adult obesity prevalence in primary care users: An exploration using Canadian primary care sentinel surveillance network (CPCSSN) data. *Can J Public Health*. 2015 July [cited 2015 Oct 6]; 106(5):e283–e289. [in press]
  31. Dean B, Lam J, Natoli J, Butler Q, Aguilar D, Nordyke R. Use of electronic medical records for health outcomes research: A literature review. *Med Care Res Rev*. 2009 [cited 2015 Oct 6]; 66(6):611–638. Available from: <http://www.ncbi.nlm.nih.gov/pubmed/19279318>
  32. Queenan J, Birtwhistle R, Williamson T. The cross-sectional representativeness of patients and providers in the Canadian primary care sentinel surveillance network. *CMAJ Open*. 2015 [cited 2015 Oct 6]. [in press].
  33. Zelmer J, Hagens S. Advancing primary care use of electronic medical records in Canada [Internet]. *Health Reform Observer*. 2014 [cited 2015 May 27]. Available from: <https://www.infoway.inforoute.ca/en/component/edocman/2134/advancing-primary-care-use-of-electronic-medical-records-in-canada/view/document?Itemid=101>
  34. The College of Family Physicians of Canada, Canadian Medical Association TRC of P and S of C. 2013 National Physician Survey [Internet]. 2013 [cited 2014 Mar 14]. Available from: <http://nationalphysiciansurvey.ca/surveys/2013/survey/survey-results/>
  35. Maayan L, Correll CU. Weight gain and metabolic risks associated with antipsychotic medications in children and adolescents. *J Child Adolesc Psychopharmacol* [Internet]. 2011 Dec [cited 2015 Feb 18]; 21(6):517–35. Available from: <http://www.ncbi.nlm.nih.gov/pubmed/22166172>
  36. Wheeler JJ. Risk of obesity at 4 to 6 years of age among overweight or obese 18-month-olds: community-based cohort study. *Can Fam Physician* [Internet]. 2013 Apr [cited 2014 Oct 16]; 59(4):e202–8. Available from: <http://www.pubmedcentral.nih.gov/articlerender.fcgi?artid=3625103&tool=pmcentrez&rendertype=abstract>
  37. Lobstein T, Jackson-Leach R, Moodie ML, Hall KD, Gortmaker SL, Swinburn B a, et al. Child and adolescent obesity: part of a bigger picture. *Lancet* [Internet]. Elsevier Ltd; 2015 Feb [cited 2015 Feb 19]; 6736(14):1–11. Available from: <http://linkinghub.elsevier.com/retrieve/pii/S0140673614617463>
  38. Summerbell C. Recommendations for growth monitoring, and prevention and management of overweight and obesity in children and youth in primary care. *CMAJ* [Internet]. 2015 Apr 7 [cited 2015 May 22]; 187(6):411–21. Available from: <http://www.ncbi.nlm.nih.gov/pubmed/25824498>

| Table 1: Percentage distribution of school aged children and adolescents, by BMI-for-age category in 2013 |                    |               |                               |                               |                             |
|-----------------------------------------------------------------------------------------------------------|--------------------|---------------|-------------------------------|-------------------------------|-----------------------------|
| Percentage (95% confidence interval)                                                                      |                    |               |                               |                               |                             |
| Age group (years)                                                                                         | Number of children | Wasting       | Normal weight                 | Overweight*                   | Obesity**                   |
| <b>All children and adolescents</b>                                                                       |                    |               |                               |                               |                             |
| 5-11                                                                                                      | 2649               | 2.6 (1.9-3.2) | 69.5 (67.7-71.2)              | 18.1 (16.6-19.6)              | 9.9 (8.7-11.0)              |
| 12 – 19                                                                                                   | 2661               | 1.5 (1.1-2.0) | 69.6 (67.8-71.4)              | 18.0 (16.5-19.5)              | 10.9 (9.7-12.1)             |
| 5 – 19                                                                                                    | 5310               | 2.1 (1.7-2.4) | 69.5 (68.3-70.8)              | 18.0 (17.0-19.1)              | 10.4 (9.5-11.2)             |
| <b>Boys</b>                                                                                               |                    |               |                               |                               |                             |
| 5 - 11                                                                                                    | 1356               | 3.3 (2.3-4.3) | 65.7 (63.1-68.3)              | 19.4 (17.3-21.5)              | 11.6 (9.8-13.3)             |
| 12 – 19                                                                                                   | 1201               | 1.8 (1.0-2.6) | 64.2 (61.4-66.9)              | 20.8 (18.5-23.2)              | 13.2 (11.2-15.1)            |
| 5– 19                                                                                                     | 2557               | 2.6 (2.0-3.3) | 65.0 (63.1-66.9)              | 20.1 (18.5-21.6)              | 12.3 (11.0-13.6)            |
| <b>Girls</b>                                                                                              |                    |               |                               |                               |                             |
| 5 - 11                                                                                                    | 1293               | 1.8 (1.0-2.5) | 73.4 <sup>†</sup> (70.9-75.8) | 16.7 (14.6-18.8)              | 8.1 <sup>†</sup> (6.6-9.6)  |
| 12 – 19                                                                                                   | 1460               | 1.3 (0.7-1.9) | 74.0 <sup>†</sup> (71.8-76.3) | 15.7 <sup>†</sup> (13.8-17.6) | 9.0 <sup>†</sup> (7.5-10.5) |
| 5 – 19                                                                                                    | 2753               | 1.5 (1.0-2.0) | 73.7 <sup>†</sup> (72.1-75.4) | 16.2 <sup>†</sup> (14.8-17.6) | 8.6 <sup>†</sup> (7.5-9.6)  |

\*The cut-off point for overweight is >85<sup>th</sup> percentile.

\*\*The cut-off point for obesity is >97<sup>th</sup> percentile.

† significantly different from boys within the same age group (p<0.05)

BMI, Body Mass Index

For Peer Review Only

| Table 2: Percentage distribution of toddler and preschool aged children, by growth status indicator <sup>‡</sup> category in 2013 |                    |                            |                               |                     |               |               |
|-----------------------------------------------------------------------------------------------------------------------------------|--------------------|----------------------------|-------------------------------|---------------------|---------------|---------------|
| Percentage (95% confidence interval)                                                                                              |                    |                            |                               |                     |               |               |
| Age group (years)                                                                                                                 | Number of children | Wasting                    | Normal weight                 | Risk of overweight* | Overweight**  | Obesity***    |
| <b>All children</b>                                                                                                               |                    |                            |                               |                     |               |               |
| 0 - 2                                                                                                                             | 1127               | 6.8 (5.3-8.3)              | 68.5 (65.7-71.3)              | 18.0 (15.7-20.3)    | 5.5 (4.1-6.9) | 1.2 (0.5-1.8) |
| 2 - 5                                                                                                                             | 1842               | 2.7 <sup>£</sup> (1.9-3.4) | 73.5 <sup>£</sup> (71.4-75.5) | 18.2 (16.4-20.0)    | 4.0 (3.0-4.9) | 1.7 (1.1-2.4) |
| 0 - 5                                                                                                                             | 2969               | 4.2 (3.5-5.0)              | 71.6 (69.9-73.2)              | 18.1 (16.7-19.5)    | 4.5 (3.8-5.3) | 1.5 (1.1-2.0) |
| <b>Boys</b>                                                                                                                       |                    |                            |                               |                     |               |               |
| 0 - 2                                                                                                                             | 566                | 8.1 (5.8-10.5)             | 63.8 (59.7-67.8)              | 20.1 (16.7-23.5)    | 6.7 (4.6-8.9) | 1.2 (0.2-2.2) |
| 2 - 5                                                                                                                             | 918                | 3.7 (2.4-5.0)              | 70.2 (67.1-73.2)              | 19.5 (16.9-22.1)    | 4.4 (3.0-5.7) | 2.3 (1.3-3.3) |
| 0 - 5                                                                                                                             | 1484               | 5.4 (4.2-6.6)              | 67.7 (65.3-70.1)              | 19.7 (17.7-21.8)    | 5.3 (4.1-6.4) | 1.9 (1.2-2.6) |
| <b>Girls</b>                                                                                                                      |                    |                            |                               |                     |               |               |
| 0 - 2                                                                                                                             | 561                | 5.5 (3.5-7.5)              | 73.3 <sup>†</sup> (69.5-77.0) | 15.9 (12.8-19.0)    | 4.3 (2.5-6.0) | 1.1 (0.1-2.0) |
| 2 - 5                                                                                                                             | 924                | 1.6 (0.8-2.5)              | 76.7 <sup>†</sup> (74.0-79.5) | 16.9 (14.4-19.4)    | 3.6 (2.3-4.8) | 1.2 (0.4-1.9) |
| 0 - 5                                                                                                                             | 1485               | 3.1 <sup>†</sup> (2.2-4.0) | 75.4 <sup>†</sup> (73.2-77.6) | 16.5 (14.6-18.4)    | 3.8 (2.8-4.8) | 1.1 (0.6-1.7) |

‡ For children birth to 2 years, weight-for-length was used as the growth status indicator and for children 2 to 5 years, BMI-for-age was used as the growth status indicator. Cut-off points are the same for each indicator.

\*The cut-off point for risk of overweight is >85<sup>th</sup> percentile.

\*\*The cut-off point for overweight is >97<sup>th</sup> percentile.

\*\*\*The cut-off point for obesity is >99.9<sup>th</sup> percentile.

£ significantly different from toddlers (p<0.05)

† significantly different from boys within the same age group (p<0.05)

| Table 3: Percentage distribution of toddlers less than 2 years, by weight-for-length category, with and without the 18-month enhanced well baby visit fee code 2008 to 2013 |                    |                                      |                  |                     |               |                |
|-----------------------------------------------------------------------------------------------------------------------------------------------------------------------------|--------------------|--------------------------------------|------------------|---------------------|---------------|----------------|
| Age group (years)                                                                                                                                                           | Number of children | Percentage (95% confidence interval) |                  |                     |               |                |
|                                                                                                                                                                             |                    | Wasting                              | Normal weight    | Risk of overweight* | Overweight**  | Obesity***     |
| <b>All toddlers</b>                                                                                                                                                         |                    |                                      |                  |                     |               |                |
| 18-month fee code                                                                                                                                                           | 1154               | 3.3 (2.2-4.4)                        | 70.6 (68.0-73.3) | 19.2 (16.9-21.6)    | 6.1 (4.6-7.5) | 0.8 (0.2-1.3)  |
| WITHOUT fee code                                                                                                                                                            | 2000               | 9.1 <sup>£</sup> (7.8-10.3)          | 68.1 (66.0-70.2) | 16.5 (14.8-18.2)    | 5.3 (4.3-6.3) | 1.1 (0.6-1.5)  |
| All Children < 2                                                                                                                                                            | 3154               | 6.9 (6.0-7.8)                        | 69.0 (67.4-70.7) | 17.5 (16.2-18.8)    | 5.6 (4.8-6.4) | 1.0 (0.6-1.3)  |
| <b>Boys</b>                                                                                                                                                                 |                    |                                      |                  |                     |               |                |
| 18-month fee code                                                                                                                                                           | 560                | 3.8 (2.1-5.4)                        | 68.2 (64.3-72.2) | 20.9 (17.4-24.3)    | 6.1 (4.0-8.1) | 1.1 (0.1-2.0)  |
| WITHOUT fee code                                                                                                                                                            | 1032               | 10.9 (8.9-12.8)                      | 65.9 (63.0-68.8) | 16.7 (14.3-19.0)    | 5.7 (4.3-7.2) | 0.9 (0.3-1.5)  |
| All Boys < 2                                                                                                                                                                | 1592               | 8.4 (7.0-9.7)                        | 66.7 (64.4-69.1) | 18.2 (16.2-20.1)    | 5.8 (4.7-7.0) | 0.9 (0.4-1.4)  |
| <b>Girls</b>                                                                                                                                                                |                    |                                      |                  |                     |               |                |
| 18-month fee code                                                                                                                                                           | 594                | 2.9 (1.4-4.3)                        | 72.9 (69.2-76.6) | 17.7 (14.5-20.8)    | 6.1 (4.1-8.1) | 0.5 (-0.1-1.2) |
| WITHOUT fee code                                                                                                                                                            | 968                | 7.1 <sup>†</sup> (5.5-8.8)           | 70.5 (67.5-73.4) | 16.3 (13.9-18.7)    | 4.9 (3.4-6.3) | 1.2 (0.5-2.0)  |
| All Girls < 2                                                                                                                                                               | 1562               | 5.5 (4.3-6.7)                        | 71.4 (69.1-73.7) | 16.8 (14.9-18.7)    | 5.3 (4.2-6.5) | 1.0 (0.4-1.5)  |

\*The cut-off point for risk of overweight is >85<sup>th</sup> percentile.

\*\*The cut-off point for overweight is >97<sup>th</sup> percentile.

\*\*\*The cut-point for obesity is >99.9<sup>th</sup> percentile.

£ significantly different from toddlers with the 18-month enhanced well baby visit code (p<0.05)

† significantly different from boys within the same fee code category (p<0.05)

For Peer Review Only

1  
2  
3  
4  
5  
6  
7  
8  
9  
10  
11  
12  
13  
14  
15  
16  
17  
18  
19  
20  
21  
22  
23  
24  
25  
26  
27  
28  
29  
30  
31  
32  
33  
34  
35  
36  
37  
38  
39  
40  
41  
42  
43  
44  
45  
46  
47  
48  
49  
50  
51  
52  
53  
54  
55  
56  
57  
58  
59  
60

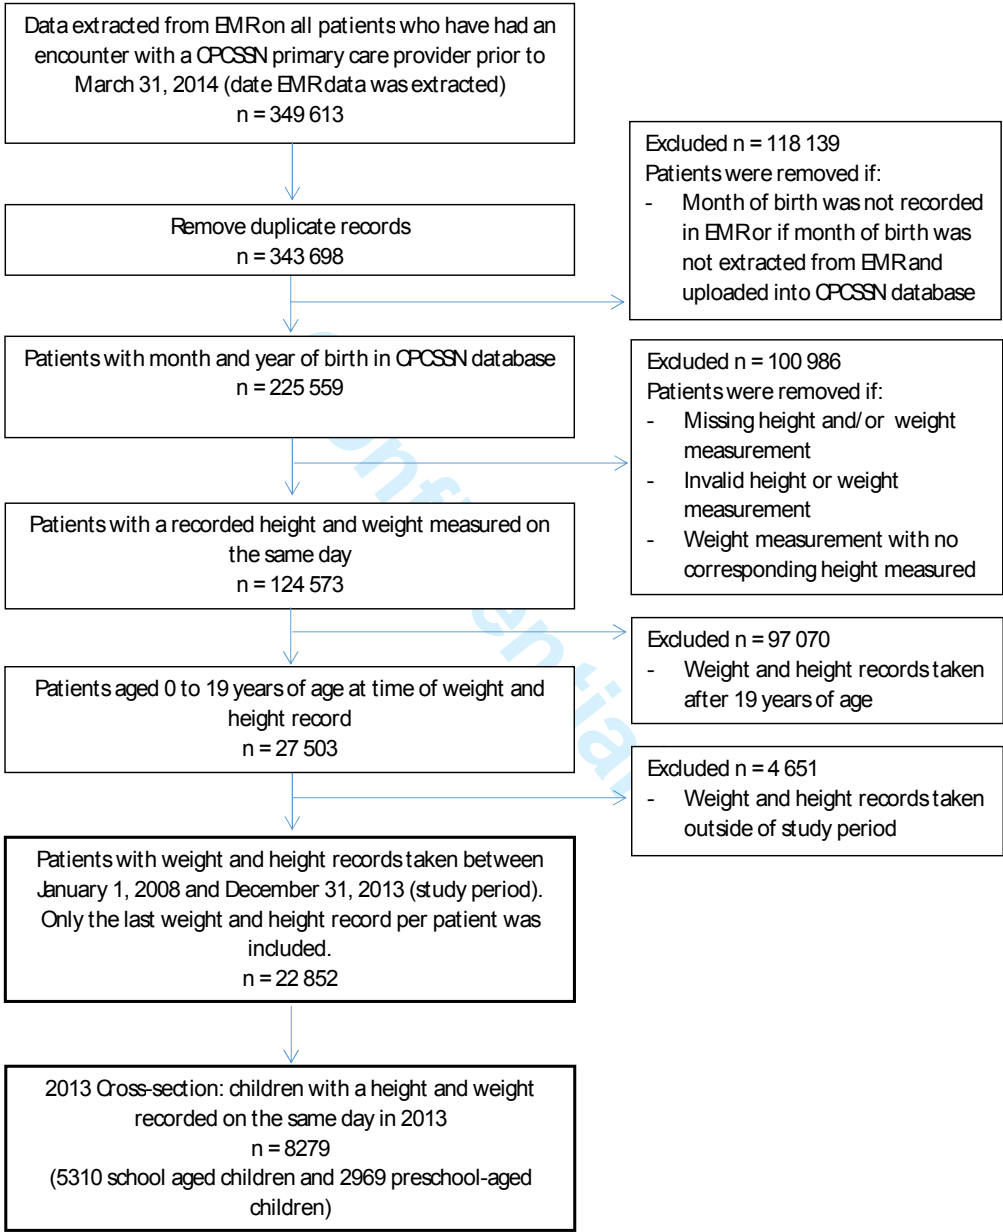

Supplement: supp_4.3.E538_2015-0108_Original_submission.pdf [file supp_4.3.E538_2015-0108_Original_submission.pdf]
